# Supplementary material
Source: PubMed Central journal article supplement (PMC2729097)
Supplement: NIHMS105571-supplement-supplement_1.pdf [file NIHMS105571-supplement-supplement_1.pdf]

**Current Author Addresses:** Dr. Loomba: Division of Gastroenterology, Department of Medicine, University of California at San Diego, UC 303, MC063, 9500 Gilman Drive, La Jolla, CA 92093.

Drs. Rowley and Pucino: Pharmacy Department, Clinical Center, Building 10, Room 1N-257, 10 Center Drive, National Institutes of Health, U.S. Department of Health and Human Services, Bethesda, MD 20892.

Dr. Wesley: Hospital Epidemiology, Clinical Center, Building 10, Room 2N-228B, 10 Center Drive, National Institutes of Health, U.S. Department of Health and Human Services, Bethesda, MD 20892.

Dr. Liang: Liver Diseases Branch, National Institute of Diabetes and Digestive and Kidney Diseases, Building 10/9B-16, MSC-1800, 10 Center Drive, National Institutes of Health, U.S. Department of Health and Human Services, Bethesda, MD 20892.

Dr. Hoofnagle: Liver Diseases Research Branch, National Institute of Diabetes and Digestive and Kidney Diseases, Building 31/9A-27, MSC-1800, 31 Center Drive, National Institutes of Health, U.S. Department of Health and Human Services, Bethesda, MD 20892.

Dr. Csako: Department of Laboratory Medicine, Clinical Center, Building 10, Room 2C-407, 10 Center Drive, National Institutes of Health, Department of Health and Human Services, Bethesda, MD 20892.

**Appendix Table. Methodological Characteristics of Clinical Trials Assessing the Efficacy of Preventive Lamivudine\***

| Study, Year (Reference)                                          | Randomization Method Reported | Detailed Inclusion or Exclusion Criteria Reported | Allocation Concealment Reported | Adherence to Assigned Treatments Described | Withdrawals among Lamivudine Recipients vs. Control Agent Recipients, <i>n</i> |
|------------------------------------------------------------------|-------------------------------|---------------------------------------------------|---------------------------------|--------------------------------------------|--------------------------------------------------------------------------------|
| <b>Randomized, controlled trial†</b>                             |                               |                                                   |                                 |                                            |                                                                                |
| Lau et al., 2003 (8)                                             | Yes                           | Yes                                               | No                              | Yes                                        | 0 vs. 0                                                                        |
| Jang et al., 2006 (21)                                           | Yes                           | Yes                                               | No                              | Yes                                        | 2 vs. 1‡                                                                       |
| <b>Prospective cohort studies with control group‡</b>            |                               |                                                   |                                 |                                            |                                                                                |
| Jia and Lin, 2004 (20)                                           | NA                            | No                                                | No                              | No                                         | NR                                                                             |
| Idilman et al., 2004 (24)                                        | NA                            | Yes                                               | No                              | Yes                                        | 0 vs. 0                                                                        |
| Shibolet et al., 2002 (25)                                       | NA                            | Yes                                               | No                              | Yes                                        | 0 vs. 0                                                                        |
| <b>Prospective cohort studies with historical control group‡</b> |                               |                                                   |                                 |                                            |                                                                                |
| Dai et al., 2004 (22)                                            | NA                            | Yes                                               | No                              | Yes                                        | 0 vs. 0                                                                        |
| Yeo et al., 2004 (15)                                            | NA                            | Yes                                               | No                              | Yes                                        | 2 vs. 3§                                                                       |
| Yeo et al., 2004 (26)                                            | NA                            | Yes                                               | No                              | Yes                                        | 0 vs. 0                                                                        |
| Yeo et al., 2005 (13)                                            | NA                            | Yes                                               | No                              | Yes                                        | 0 vs. 0                                                                        |
| Hsu et al., 2006 (23)                                            | NR                            | No                                                | NR                              | No                                         | NR                                                                             |
| <b>Retrospective cohort studies  </b>                            |                               |                                                   |                                 |                                            |                                                                                |
| Lim et al., 2002 (17)                                            | NA                            | Yes                                               | No                              | Yes                                        | 0 vs. 0                                                                        |
| Leaw et al., 2004 (19)                                           | NA                            | Yes                                               | No                              | Yes                                        | 0 vs. 0                                                                        |
| Nagamatsu et al., 2004 (16)                                      | NA                            | Yes                                               | No                              | Yes                                        | 0 vs. 0                                                                        |
| <b>Retrospective cohort studies†</b>                             |                               |                                                   |                                 |                                            |                                                                                |
| Lee et al., 2003 (18)                                            | NA                            | Yes                                               | No                              | Yes                                        | 0 vs. 0                                                                        |

\* NA = not applicable; NR = not reported.

† Preventive lamivudine vs. deferred lamivudine.

‡ Reasons for noncompletion were vascular insufficiency (1 lamivudine recipient) and unknown (1 lamivudine recipient and 1 control agent recipient).

§ Reasons for noncompletion were hyperbilirubinemia (1 lamivudine recipient and 2 control agent recipients), use of an oral cytotoxic agent (1 control agent recipient), and administration of lamivudine after initiation of chemotherapy (1 lamivudine recipient).

|| Preventive lamivudine vs. no lamivudine.
